# Supplementary material
Source: Springer Nature journal article supplement (https://www.springermedizin.de/resource/supplementary/12960_2010_267_MOESM3_ESM.pdf/9570774)
Supplement: MOESM3 [file 9570774]

499 titles & abstracts identified from searches (see Additional File 1)

25 full text articles obtained for further consideration

*7 included studies*  
1 RCT  
4 CBA  
1 Case control study  
1 Before-after study

*Of the 492 excluded studies  
>300 did not evaluate CHWs*

*The other excluded studies evaluated the following roles or aspects of CHWs:*

- CHW impact on maternal mortality
- CHW impact on trachoma morbidity
- CHW impact on tuberculosis morbidity
- CHW ability to diagnose pneumonia
- CHW knowledge
- Community attitudes towards CHWs
- Adherence to treatments delivered by CHWs
- Hygiene education by CHWs
- Comparisons within a CHW program of differing interventions without the use of a non-CHW control group

RCT: Randomised Controlled Trial  
CBA: Controlled Before After Study
